# Supplementary material for: Emergence and spread of feline infection peritonitis due to a highly pathogenic canine/feline recombinant coronavirus
Source: Research Square preprint supplement (doi:10.21203/rs.3.rs-3576326/v1), 2023-11-14
Supplement: Supplementary file 2 [file 9b39f12f528abc61b59375ca.docx]

**Supplementary table 1: FIP outbreak Cyprus Jan-Aug 2023; case distribution – sex (with NA).**

| Sex | n | Total | Percentage |
| --- | --- | --- | --- |
| Female | 54 | 164 | 32.93 |
| Male | 109 | 164 | 66.46 |
| Unknown | 1 | 164 | 0.61 |

**Supplementary table 2: FIP outbreak Cyprus Jan-Aug 2023; case distribution – sex (without NA)**

| Sex | n | Total | Percentage |
| --- | --- | --- | --- |
| Female | 54 | 163 | 33.13 |
| Male | 109 | 163 | 66.87 |

**Supplementary table 3: FIP outbreak Cyprus Jan-Aug 2023; case distribution – Age stats (years); the age of 39 cases are missing**

| Mean_age | Median_age | Min_age | Max_age |
| --- | --- | --- | --- |
| 4.424 | 3 | 1 | 16 |

**Supplementary table 4: FIP outbreak Cyprus Jan-Aug 2023; case distribution – FIP form**

| Form | n | Total | Percentage |
| --- | --- | --- | --- |
| Non-effusive | 2 | 164 | 2.44 |
| Neurological | 46 | 164 | 28.05 |
| Effusive | 114 | 164 | 69.51 |

**Supplementary table 5: FIP outbreak Cyprus Jan-Aug 2023; case distribution – District**

| District | n | Total | Percentage |
| --- | --- | --- | --- |
| Nicosia | 50 | 164 | 30.49 |
| Famagousta | 48 | 164 | 29.27 |
| Larnaca | 28 | 164 | 17.07 |
| Limassol | 19 | 164 | 11.59 |
| Paphos | 19 | 164 | 11.59 |

**Supplementary table 6: RNA samples for sequencing; case distribution – Sex**

| Sex | n | Total | Percentage |
| --- | --- | --- | --- |
| Female | 33 | 93 | 35.48 |
| Male | 60 | 93 | 64.52 |

**Supplementary table 7: RNA samples for sequencing; case distribution – Age stats (years).** The ages of 21 cats are missing.

| Mean_age | Median_age | Min_age | Max_age |
| --- | --- | --- | --- |
| 4.38 | 3 | 1 | 16 |

**Supplementary table 8: RNA samples for sequencing; case distribution – FIP form**

| Form | n | Total | Percentage |
| --- | --- | --- | --- |
| Non-effusive | 2 | 93 | 2.15 |
| Neurological | 14 | 93 | 15.05 |
| Effusive | 77 | 93 | 82.80 |

**Supplementary table 9: RNA samples for sequencing; case distribution – District**

| District | n | Total | Percentage |
| --- | --- | --- | --- |
| Nicosia | 31 | 93 | 39.78 |
| Famagousta | 27 | 93 | 29.03 |
| Larnaca | 15 | 93 | 16.13 |
| Limassol | 8 | 93 | 8.6 |
| Paphos | 3 | 93 | 3.23 |
| Cyprus unk | 1 | 93 | 1.08 |
| UK | 2 | 93 | 2.15 |

**Supplementary table 10: RNA samples for sequencing; case distribution – Collection dates**

| District | n | Total | Percentage |
| --- | --- | --- | --- |
| October-21 | 1 | 93 | 1.08 |
| November-21 | 1 | 93 | 1.08 |
| December-21 | 1 | 93 | 1.08 |
| February-22 | 1 | 93 | 1.08 |
| March-22 | 1 | 93 | 1.08 |
| August-22 | 1 | 93 | 1.08 |
| December-22 | 2 | 93 | 2.15 |
| January-23 | 7 | 93 | 7.53 |
| February-23 | 22 | 93 | 23.66 |
| March-23 | 35 | 93 | 37.63 |
| April-23 | 19 | 93 | 20.43 |
| September-23 | 1 | 93 | 1.08 |
| October-23 | 1 | 93 | 1.08 |
| Unknown | 1 | 93 | 1.08 |

**Supplementary table 11: RNA samples for sequencing; case distribution – Sample type used for extraction**

| District | n | Total | Percentage |
| --- | --- | --- | --- |
| Peritoneal | 57 | 93 | 61.29 |
| Pleural | 18 | 93 | 19.35 |
| CSF | 14 | 93 | 15.05 |
| Nasal Swab | 1 | 93 | 1.08 |
| Tissue/LNa intestinal | 2 | 93 | 2.15 |
| Unknown | 1 | 93 | 1.08 |

aLN – lymph node

**Supplementary table 12: Successfully sequenced spike protein; case distribution – Sex**

| Sex | n | Total | Percentage |
| --- | --- | --- | --- |
| Female | 19 | 45 | 42.22 |
| Male | 26 | 45 | 57.78 |

**Supplementary table 13: Successfully sequenced spike protein; case distribution – Age stats (years).** The ages of 9 cats are missing

| Mean_age | Median_age | Min_age | Max_age |
| --- | --- | --- | --- |
| 4.67 | 3 | 1 | 16 |

**Supplementary table 14: Successfully sequenced spike protein; case distribution – FIP form**

| Form | n | Total | Percentage |
| --- | --- | --- | --- |
| Non-effusive | 1 | 45 | 2.22 |
| Neurological | 5 | 45 | 11.11 |
| Effusive | 39 | 45 | 86.67 |

**Supplementary table 15: Successfully sequenced spike protein; case distribution – District**

| District | n | Total | Percentage |
| --- | --- | --- | --- |
| Nicosia | 15 | 45 | 33.33 |
| Famagousta | 17 | 45 | 37.78 |
| Larnaca | 5 | 45 | 11.11 |
| Limassol | 4 | 45 | 8.89 |
| Paphos | 2 | 45 | 4.44 |
| UK | 2 | 45 | 4.44 |

**Supplementary table 16: Successfully sequenced spike protein; case distribution – Collection dates**

| District | n | Total | Percentage |
| --- | --- | --- | --- |
| January-23 | 3 | 45 | 6.67 |
| February-23 | 7 | 45 | 15.56 |
| March-23 | 21 | 45 | 46.67 |
| April-23 | 12 | 45 | 26.67 |
| September-23 | 1 | 45 | 2.22 |
| October-23 | 1 | 45 | 2.22 |

**Supplementary table 17: Successfully sequenced spike protein; case distribution – Sample type used for extraction**

| District | n | Total | Percentage |
| --- | --- | --- | --- |
| Peritoneal | 32 | 45 | 71.11 |
| Pleural | 7 | 45 | 15.56 |
| CSF | 5 | 45 | 11.11 |
| Tissue/LNa intestinal | 1 | 45 | 2.22 |

**a**LN – lymph node

**Supplementary table 18: Primer sequences used during amplification of the FCoV-23 genome.** Primers were designed either using primal scheme1 or through manual design following multi-sequence alignment of available FCoV whole genomes on NCBI2 with Mafft3 (v7.490). The greyed-out section highlights the gap in the assembled consensus genome, these primers may work, but not efficiently. The primers that amplify the regions used in Figure 2 amplify very well, and these are listed both at the top of the table and in their place in the draft scheme, the others amplicons have varying levels of efficiency. This should not be considered a finalised scheme.

| Scheme location | Forward (5'-3') | Reverse (5'-3') | Specific target (where applicable) | Start (consensus genome) | End (consensus genome) | Expected length | Note |
| --- | --- | --- | --- | --- | --- | --- | --- |
| 28 to 32 | GACGCAGACTTCAGTGTTA | ACCATTATGCCATTRTARTA | Spike | 19728 | 23341 | 3613 | a |
| 23 | TGCCCAGCTGARATTGTTAARACAG | CATAGTTGTAAGYTCAAGACCACC | POL1b region | 16376 | 17426 | 1050 |  |
| 35 | TGTCTBAGTACTGGHTGYTGTGG | AGCATAGGGTCTACAAAATGCAAC | Orf3c/E/M region part 1 | 23592 | 24616 | 1024 |  |
| 36 | GATGGCATTGTKACAAYAACTGTCTT | ARCCGAACATTACATATCTGGAAACTT | Orf3c/E/M region part 2 | 24380 | 25489 | 1109 |  |
| 1 | GGACACCAACTCGAACTAAACGA | GTCCARTCACCDACACCACTACT |  | 0 | 992 | 992 |  |
| 2 | GTAGCACCRCCAGTCAAGARRAAYTC | GTRGCRAARAATGCACTATCAAGRCC |  | 801 | 1775 | 974 |  |
| 3 | GTGAARGCHTTYGATGTYTTCACACA | TACRGGCACACTATGCAGTCTTAA |  | 1605 | 2676 | 1071 |  |
| 3 to 4 | TTGTCAAGCTTGTCAGTGT | ATTGAGCATCGTCTCCAA |  | 1705 | 3726 | 2021 |  |
| 5 to 7 | TGGGCTGYTGCTGTYGAYGAACA | GTGTTTAAGYGCGAGAACTGMCTT |  | 3438 | 6408 | 2970 |  |
| 8 to 9 | CAGTACMTYAACCTGTGHTRTC | CCACCRAAGCAAAAACCAGCT |  | 6270 | 8135 | 1865 | b |
| 9 | GGTAAGTGCATGACTTTYGATGC | CCACCRAAGCAAAAACCAGCT |  | 7191 | 8135 | 944 |  |
| 9 to 11 | GGTAAGTGCATGACTTTYGATGC | ACCYACTGACCACARGTACCAGC |  | 7191 | 9342 | 2151 |  |
| 10 to 14 | TGGTTATTAAGAAYGGTRTYGTTCAACC | TGYCTAAYCTTGGAAAGCACTTCA |  | 7567 | 11363 | 3796 |  |
| 14 to 16 | GCTTACCATGTTGATAAGTCTTACTACAAA | AGACTTGCTCATGGTCCATAACG |  | 10313 | 12501 | 2188 |  |
| 17 | TTAAACGAGTGCGGGGTTCTAG | GGYACACCATCWATRTGRACTTTACG |  | 12282 | 13264 | 982 |  |
| 18 to 19 | ATGGGAATKACTTCATGTTTAGAR | CAGAAACAGCTTGAAAGATGT |  | 12977 | 14352 | 1375 |  |
| 20 | ACAACYAGYGGTGATGGTACTACA | CCAAACACATTACCATTAGCACAGAG |  | 14285 | 15316 | 1031 |  |
| 21 to 22 | GGCATGTGTGTTGTTTGTGGTT | TGTARATDACATAATCRTACTCACTACC |  | 15050 | 16684 | 1634 |  |
| 23 | TGCCCAGCTGARATTGTTAARACAG | CATAGTTGTAAGYTCAAGACCACC | POL1b region | 16376 | 17426 | 1050 |  |
| 24 to 25 | TTTGCTATGCGTAATGTDAGAGCRTG | TGGCACTRAGYCCYTTCACAGC |  | 17072 | 18835 | 1763 |  |
| 26 to 27 | AATRGYAAAGCMCTCCARAGT* | GARTTTCKCCAAAATATATAATTGGCATGC |  | Not present | 20120 | 1648 | c |
| 28 to 32 | GACGCAGACTTCAGTGTTA | ACCATTATGCCATTRTARTA | Spike | 19728 | 23341 | 3613 | d |
| 33 | GCCCTTAAYCTTGGYGCRCGTMT | ACRCATATTCCTGACCATGCCG |  | Not present | Not present |  | e |
| 34 to 35 | GCAGCACTTAAYGCBTATGYGTC | AGCATAGGGTCTACAAAATGCAAC |  | Not present | 24616 |  | f |
| 35 | TGTCTBAGTACTGGHTGYTGTGG | AGCATAGGGTCTACAAAATGCAAC | NSP3c/E/M region part 1 | 23592 | 24616 | 1024 |  |
| 36 | GATGGCATTGTKACAAYAACTGTCTT | ARCCGAACATTACATATCTGGAAACTT | NSP3c/E/M region part 2 | 24380 | 25489 | 1109 |  |
| 36 to 37 | GATGGCATTGTKACAAYAACTGTCTT | CTTATTACCTATTCCYTTGGGAACAA |  | 24380 | 25407 | 1027 |  |
| 38 | CYGGTGATTACTCAACAGAAGCA | GTTTTGGCATCATCYTTGGCAGG |  | 25779 | 26805 | 1026 |  |
| 38 to 40 | CYGGTGATTACTCAACAGAAGCA | ACATTTTAAACAATCACTAGATCCAGACG |  | 25779 | 28167 | 2388 |  |
| 40 | CARCTTTTGARRCCAGACTGYC | ACATTTTAAACAATCACTAGATCCAGACG |  | 27161 | 28167 | 1006 |  |

aAlso amplifies GHR, deletion variant; shorter. bPoor performance. cAmplification works, however F primer was not incorporated into the draft genome possibly due to variation in the amplified viruses. d Also amplifies GHR, deletion variant shorter. e Poor performance. f Very poor performance

**Supplementary table 19: Results of recombination analysis.** Several tools run using RDP5 and using a multi sequence alignment between the assembled FCoV-23 genome, a pCCoVII genome (KP981644.1), an FCoVII genome (LC742526.1) and an FCoVI genome (MT239440.1) were used to analyse recombination.

| Tool used via RDP5 | P- values |
| --- | --- |
| RDP54 | 1E-30x10-300 |
| BootScan5 | 3.584x10-80 |
| MaxChi6 | 3.000x10-200 |
| Chimaera7 | 3.000x10-200 |
| SiScan8 | 2.390x10-88 |
| 3Seq9 | 1E-30x10-300 |

**Supplementary table 20: Comparison of FCoV-23 Spike-2 with determinant mutations.** The consensus FCoV-23 sequence was compared with key sequence features that were identified in Zehr *et al.* 10 as positively associated with the FECV biotype. Association with biotype was assessed whether mutations had been previously more likely been associated with one of the biotypes.

| Position in FCoV-23 | Amino acid sequence in FCoV-23 | Amino acid composition at site associated with biotype 10 |
| --- | --- | --- |
| 534 | T | **New mutation** |
| 596 | E | **New mutation** |
| 1404 | Not determined | n/a |
| 1405 | Not determined | n/a |
| 1416 | Not determined | n/a |
| 1434 | I | Marginally tentative FIPV |

**Supplementary table 21: Comparison of FCoV-23 Orf3a,b, and c with determinant mutations.** The consensus FCoV-23 sequence was compared with key sequence features that were identified in Zehr *et al.* 10 as positively associated with the FECV biotype. Association with biotype was assessed whether mutations had been previously more likely been associated with one of the biotypes. Sites could previously not be “statistically associated uniquely with one phenotype”10.

| Protein | Position in FCoV-23 | Amino acid sequence in FCoV-23 | Amino acid composition at site associated with biotype 10 |
| --- | --- | --- | --- |
| Orf3a | **30** | L | No indication |
| Orf3a | **32** | N | No indication |
| Orf3a | **47** | E | No indication |
| Orf3a | **58** | Q | No indication |
| Orf3a | **61-62 gap** | IE | No indication |
| Orf3a | **64** | S | No indication |
| Orf3a | **65** | S | **New mutation** |
| Orf3b | **2** | R | **New mutation** |
| Orf3b | **64** | K | No indication |
| Orf3b | **71** | A | No indication |
| Orf3c | **11** | S | No indication |
| Orf3c | **71** | G | No indication |
| Orf3c | **72** | V | No indication |
| Orf3c | **159** | M | No indication |
| Orf3c | **165** | T | No indication |
| Orf3c | **175** | G | No indication |

**Supplementary table 22: Comparison of FCoV-23 Orf7b with determinant mutations.** The consensus FCoV-23 sequence was compared with key sequence features that were identified in Zehr *et al.* 10 as positively associated with the FECV biotype. Association with biotype was assessed whether mutations had been previously more likely been associated with one of the biotypes.

| Position in FCoV-23 | Amino acid sequence in FCoV-23 | Amino acid composition at site associated with biotype 10 |
| --- | --- | --- |
| 5 | V | Marginally tentative FIPV |
| 11 | L | No indication |
| 12 | A | No indication |
| 19 | D | No indication |
| 25 | H | No indication |
| 36 | Q | No indication |
| 39 | V | No indication |
| 41 | H | No indication |
| 48 | H | No indication |
| 50 | I | No indication |
| 63 | S | No indication |
| 68 | N | No indication |
| 82 | I | No indication |
| 89 | S | No indication |
| 106 | N | No indication |
| 107 | Q | No indication |
| 129 | T | No indication |
| 131 | F | No indication |
| 139 | T | No indication |
| 140 | Q | No indication |
| 145 | R | No indication |
| 147 | F | No indication |
| 149 | H | No indication |
| 152 | S | No indication |
| 159 | **I** | **New mutation** |
| 160 | H | No indication |
| 167 | Y | No indication |
| 168 | C | No indication |
| 170 | H | No indication |
| 172 | L | No indication |
| 187 | K | No indication |
| 190 | R | No indication |
| 191 | S | No indication |
| 194 | V | No indication |
| 198 | L | No indication |
| 199 | N | No indication |
| 200 | Q | No indication |
| 202 | H | No indication |
| 203 | **H** | **New mutation** |
| 204 | T | No indication |

**References**

1 Quick, J. *et al.* Multiplex PCR method for MinION and Illumina sequencing of Zika and other virus genomes directly from clinical samples. *Nature Protocols* **12**, 1261-1276, doi:10.1038/nprot.2017.066 (2017).

2 Sayers, E. W. *et al.* Database resources of the national center for biotechnology information. *Nucleic Acids Res* **50**, D20-d26, doi:10.1093/nar/gkab1112 (2022).

3 Katoh, K., Misawa, K., Kuma, K. & Miyata, T. MAFFT: a novel method for rapid multiple sequence alignment based on fast Fourier transform. *Nucleic Acids Res* **30**, 3059-3066, doi:10.1093/nar/gkf436 (2002).

4 Martin, D. P. *et al.* RDP5: a computer program for analyzing recombination in, and removing signals of recombination from, nucleotide sequence datasets. *Virus Evolution* **7**, doi:10.1093/ve/veaa087 (2020).

5 Martin, D. P., Posada, D., Crandall, K. A. & Williamson, C. A modified bootscan algorithm for automated identification of recombinant sequences and recombination breakpoints. *AIDS Res Hum Retroviruses* **21**, 98-102, doi:10.1089/aid.2005.21.98 (2005).

6 Smith, J. M. Analyzing the mosaic structure of genes. *J Mol Evol* **34**, 126-129, doi:10.1007/bf00182389 (1992).

7 Posada, D. & Crandall, K. A. Evaluation of methods for detecting recombination from DNA sequences: Computer simulations. *Proceedings of the National Academy of Sciences* **98**, 13757-13762, doi:10.1073/pnas.241370698 (2001).

8 Gibbs, M. J., Armstrong, J. S. & Gibbs, A. J. Sister-Scanning: a Monte Carlo procedure for assessing signals in recombinant sequences. *Bioinformatics* **16**, 573-582, doi:10.1093/bioinformatics/16.7.573 (2000).

9 Lam, H. M., Ratmann, O. & Boni, M. F. Improved Algorithmic Complexity for the 3SEQ Recombination Detection Algorithm. *Mol Biol Evol* **35**, 247-251, doi:10.1093/molbev/msx263 (2018).

10 Zehr, J. D. *et al.* Natural selection differences detected in key protein domains between non-pathogenic and pathogenic feline coronavirus phenotypes. *Virus Evol* **9**, vead019, doi:10.1093/ve/vead019 (2023).
